# Supplementary material for: Integrative proteomic analyses across common cardiac diseases yield mechanistic insights and enhanced prediction
Source: PubMed Central journal article supplement — Nat Cardiovasc Res. 2024 Nov 21;3(12):1516–30. doi: 10.1038/s44161-024-00567-0 (PMC11634769; doi:10.1038/s44161-024-00567-0), 2024-11-21
Supplement: 44161_2024_567_MOESM1_ESM.pdf [file 44161_2024_567_MOESM1_ESM.pdf]

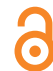

---

# **Integrative proteomic analyses across common cardiac diseases yield mechanistic insights and enhanced prediction**

---

In the format provided by the authors and unedited

---

## TABLE OF CONTENTS

|                                                                                                                                                                                                                                                         |          |
|---------------------------------------------------------------------------------------------------------------------------------------------------------------------------------------------------------------------------------------------------------|----------|
| <b>Supplementary Figures.....</b>                                                                                                                                                                                                                       | <b>2</b> |
| Supplementary Fig. 1. Associations of proteins with sex-differential effects on cardiac disease risk in premenopausal vs. postmenopausal women.....                                                                                                     | 2        |
| Supplementary Fig. 2. Risk prediction of incident coronary artery disease, heart failure, and atrial fibrillation in the UKB-PPP by risk scores based on clinical risk factors and/or circulating proteins that were also measured in the WHI-LLS. .... | 4        |

## SUPPLEMENTARY FIGURES

Supplementary Fig. 1. Associations of proteins with sex-differential effects on cardiac disease risk in premenopausal vs. postmenopausal women.

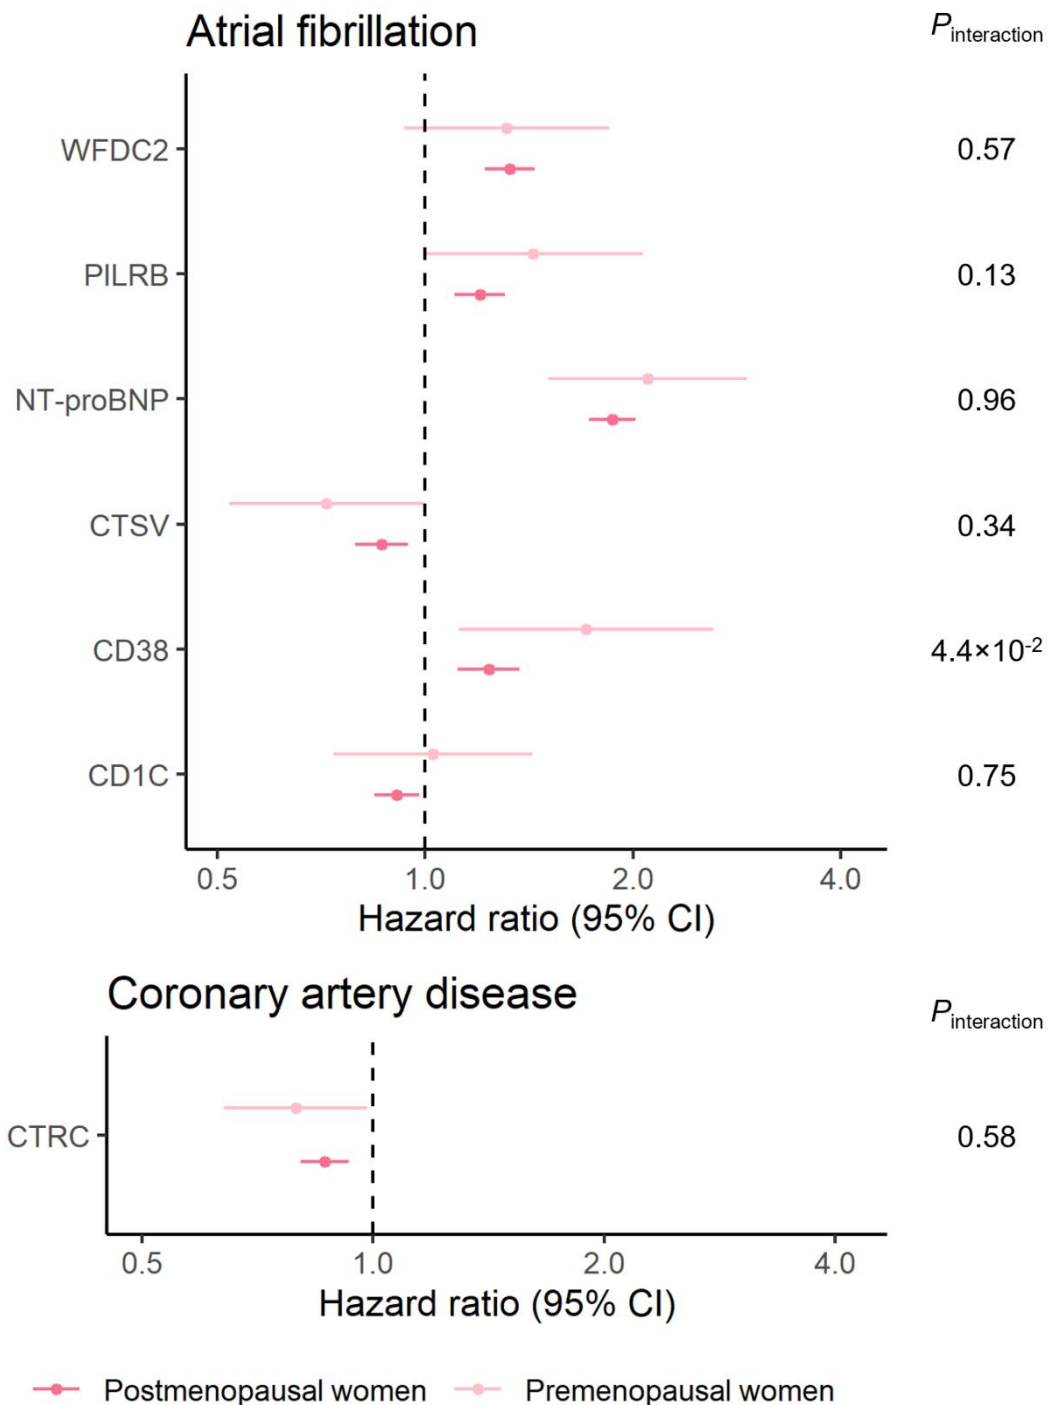

Forest plots depict protein-disease associations with “sex-differential effects” in premenopausal ( $n=5,838$ ) and postmenopausal women ( $n=15,026$ ) from the UKB-PPP. Menopause status was ascertained at baseline by self-report and unknown for 3,837 women. All associations are indicate using hazard ratios with corresponding 95% confidence intervals (CIs) for the indicated protein (per standard deviation) on the indicated outcome in

premenopausal and postmenopausal separately.  $P_{\text{interaction}}$  indicates the two-sided  $P$ -value for the interaction term between “sex” and the indicated protein on the corresponding outcome.  $P$ -values were not adjusted for multiple comparisons. All associations were tested using multivariable-adjusted Cox proportional hazards models (see *Methods*).

**Supplementary Fig. 2. Risk prediction of incident coronary artery disease, heart failure, and atrial fibrillation in the UKB-PPP by risk scores based on clinical risk factors and/or circulating proteins that were also measured in the WHI-LLS.**

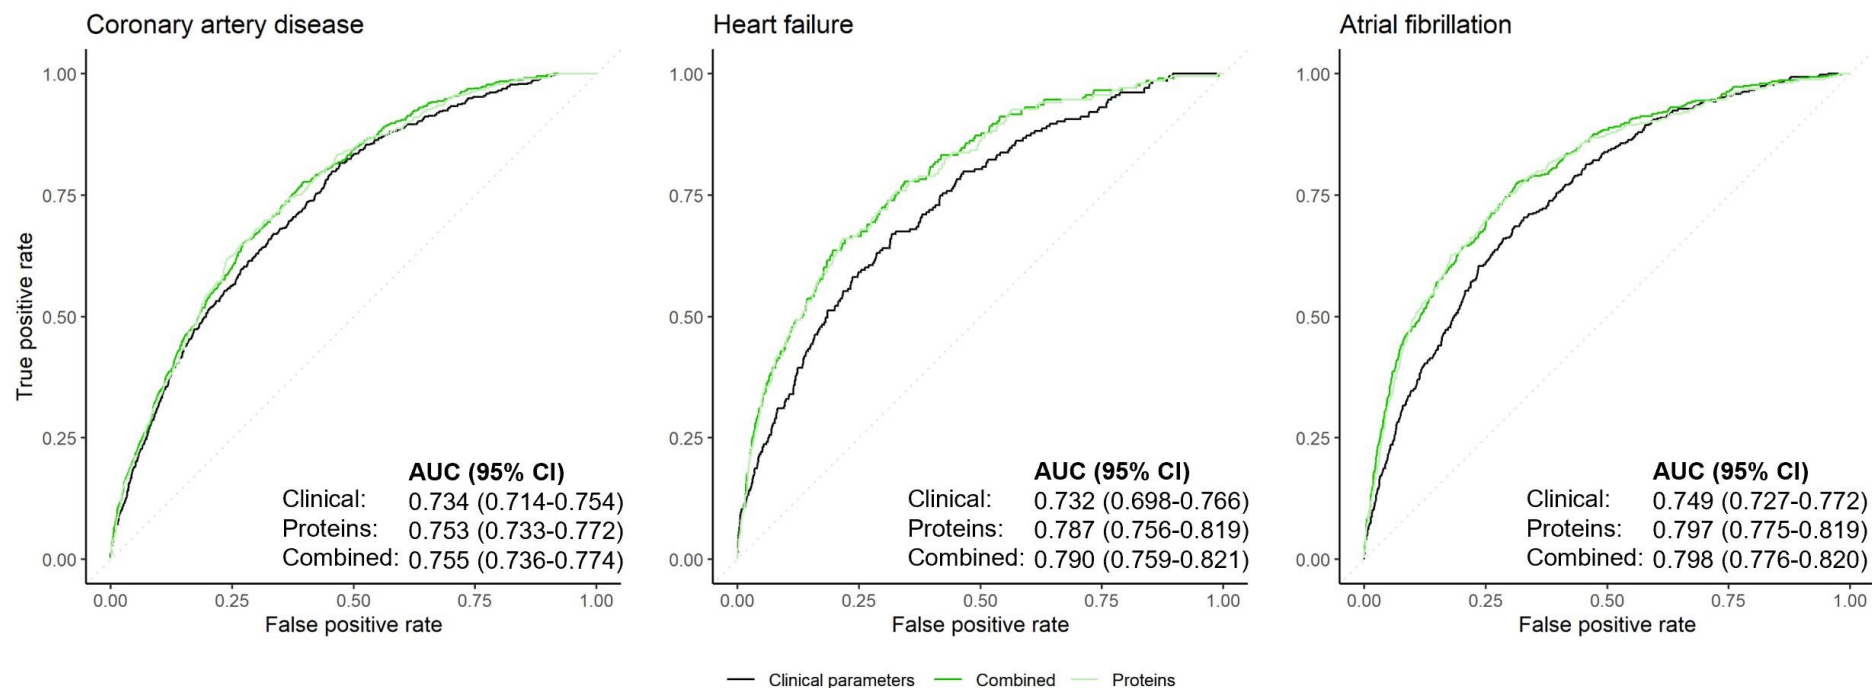

The receiver-operating characteristics curves depict the accuracy of the clinical, proteomic, and combined risk scores in predicting coronary artery disease, heart failure, and atrial fibrillation in the UKB-PPP testing set ( $n=8,863$ ). Areas under the curve (AUCs) and corresponding 95% confidence intervals (95% CIs) quantify the performance of each model. Models with multiple candidate features were constructed using logistic least absolute shrinkage and selection operator (LASSO) models; the combined models included all clinical predictors (see *Methods*) as well as the circulating proteins that were also measured in the WHI-LLS as potential covariates in the final model. Participants were followed for a median (interquartile range) follow-up of 11.1 (10.4-11.8) years.
